# Supplementary material for: Identification of pathways regulating cell size and cell-cycle progression by RNAi
Source: Springer Nature journal article supplement (doi:10.1038/nature04469), 2006-02-01
Supplement: nature04469-s05.pdf [file nature04469-s05.pdf]

Transfection of S2 cells in triplicate

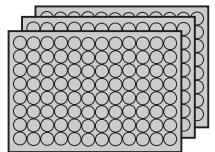

4 days  
Fixation of cells,  
DNA staining

High-throughput  
flow cytometry  
analysis

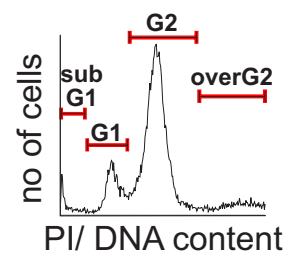

DNA content phenotypes  
subG1 (apoptosis)  
G1  
G2  
overG2 (cytokinesis)

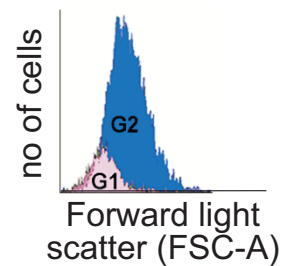

Cell size phenotypes  
G1 FSC-A  
G2 FSC-A
