# Supplementary material for: Identification of pathways regulating cell size and cell-cycle progression by RNAi
Source: Springer Nature journal article supplement (doi:10.1038/nature04469), 2006-02-01

a

Chromosome passenger complex/checkpoint

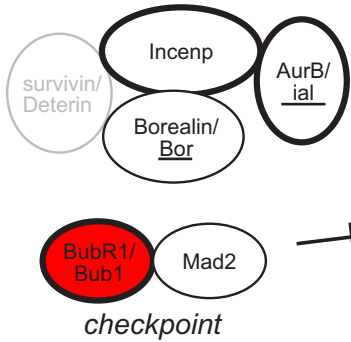

APC/cyclosome

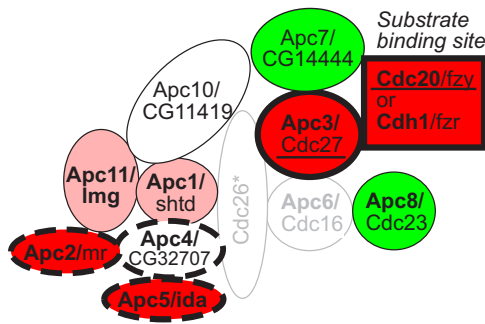

Separase

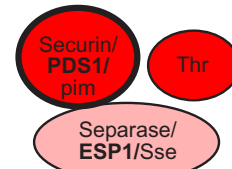

Cohesin

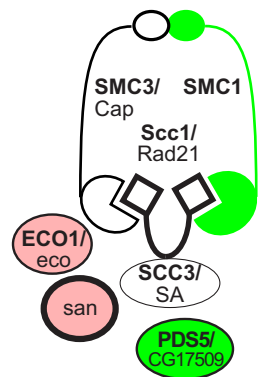

b

Condensin

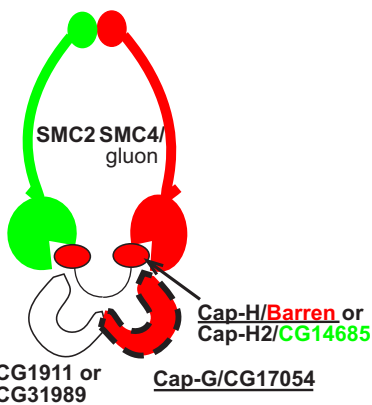

c

DNA replication initiation

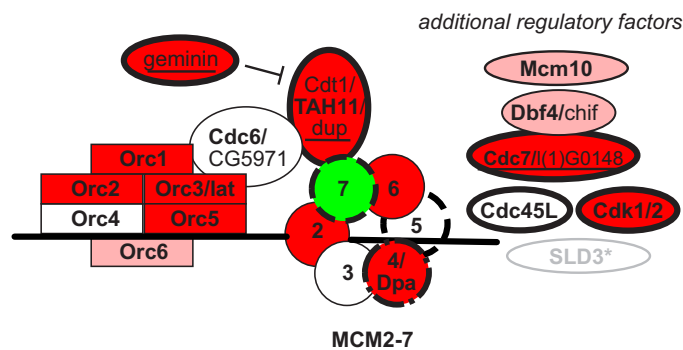

d

RNA polymerase II complex

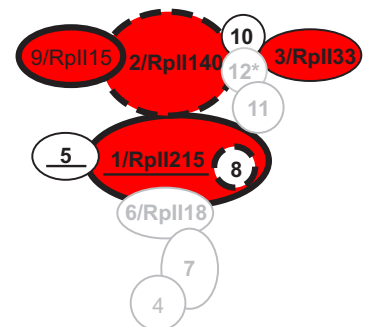

Supplement: nature04469-s16.pdf [file nature04469-s16.pdf]
