# Supplementary figures and images for: Identification of pathways regulating cell size and cell-cycle progression by RNAi
Source: Springer Nature journal article supplement (doi:10.1038/nature04469), 2006-02-01

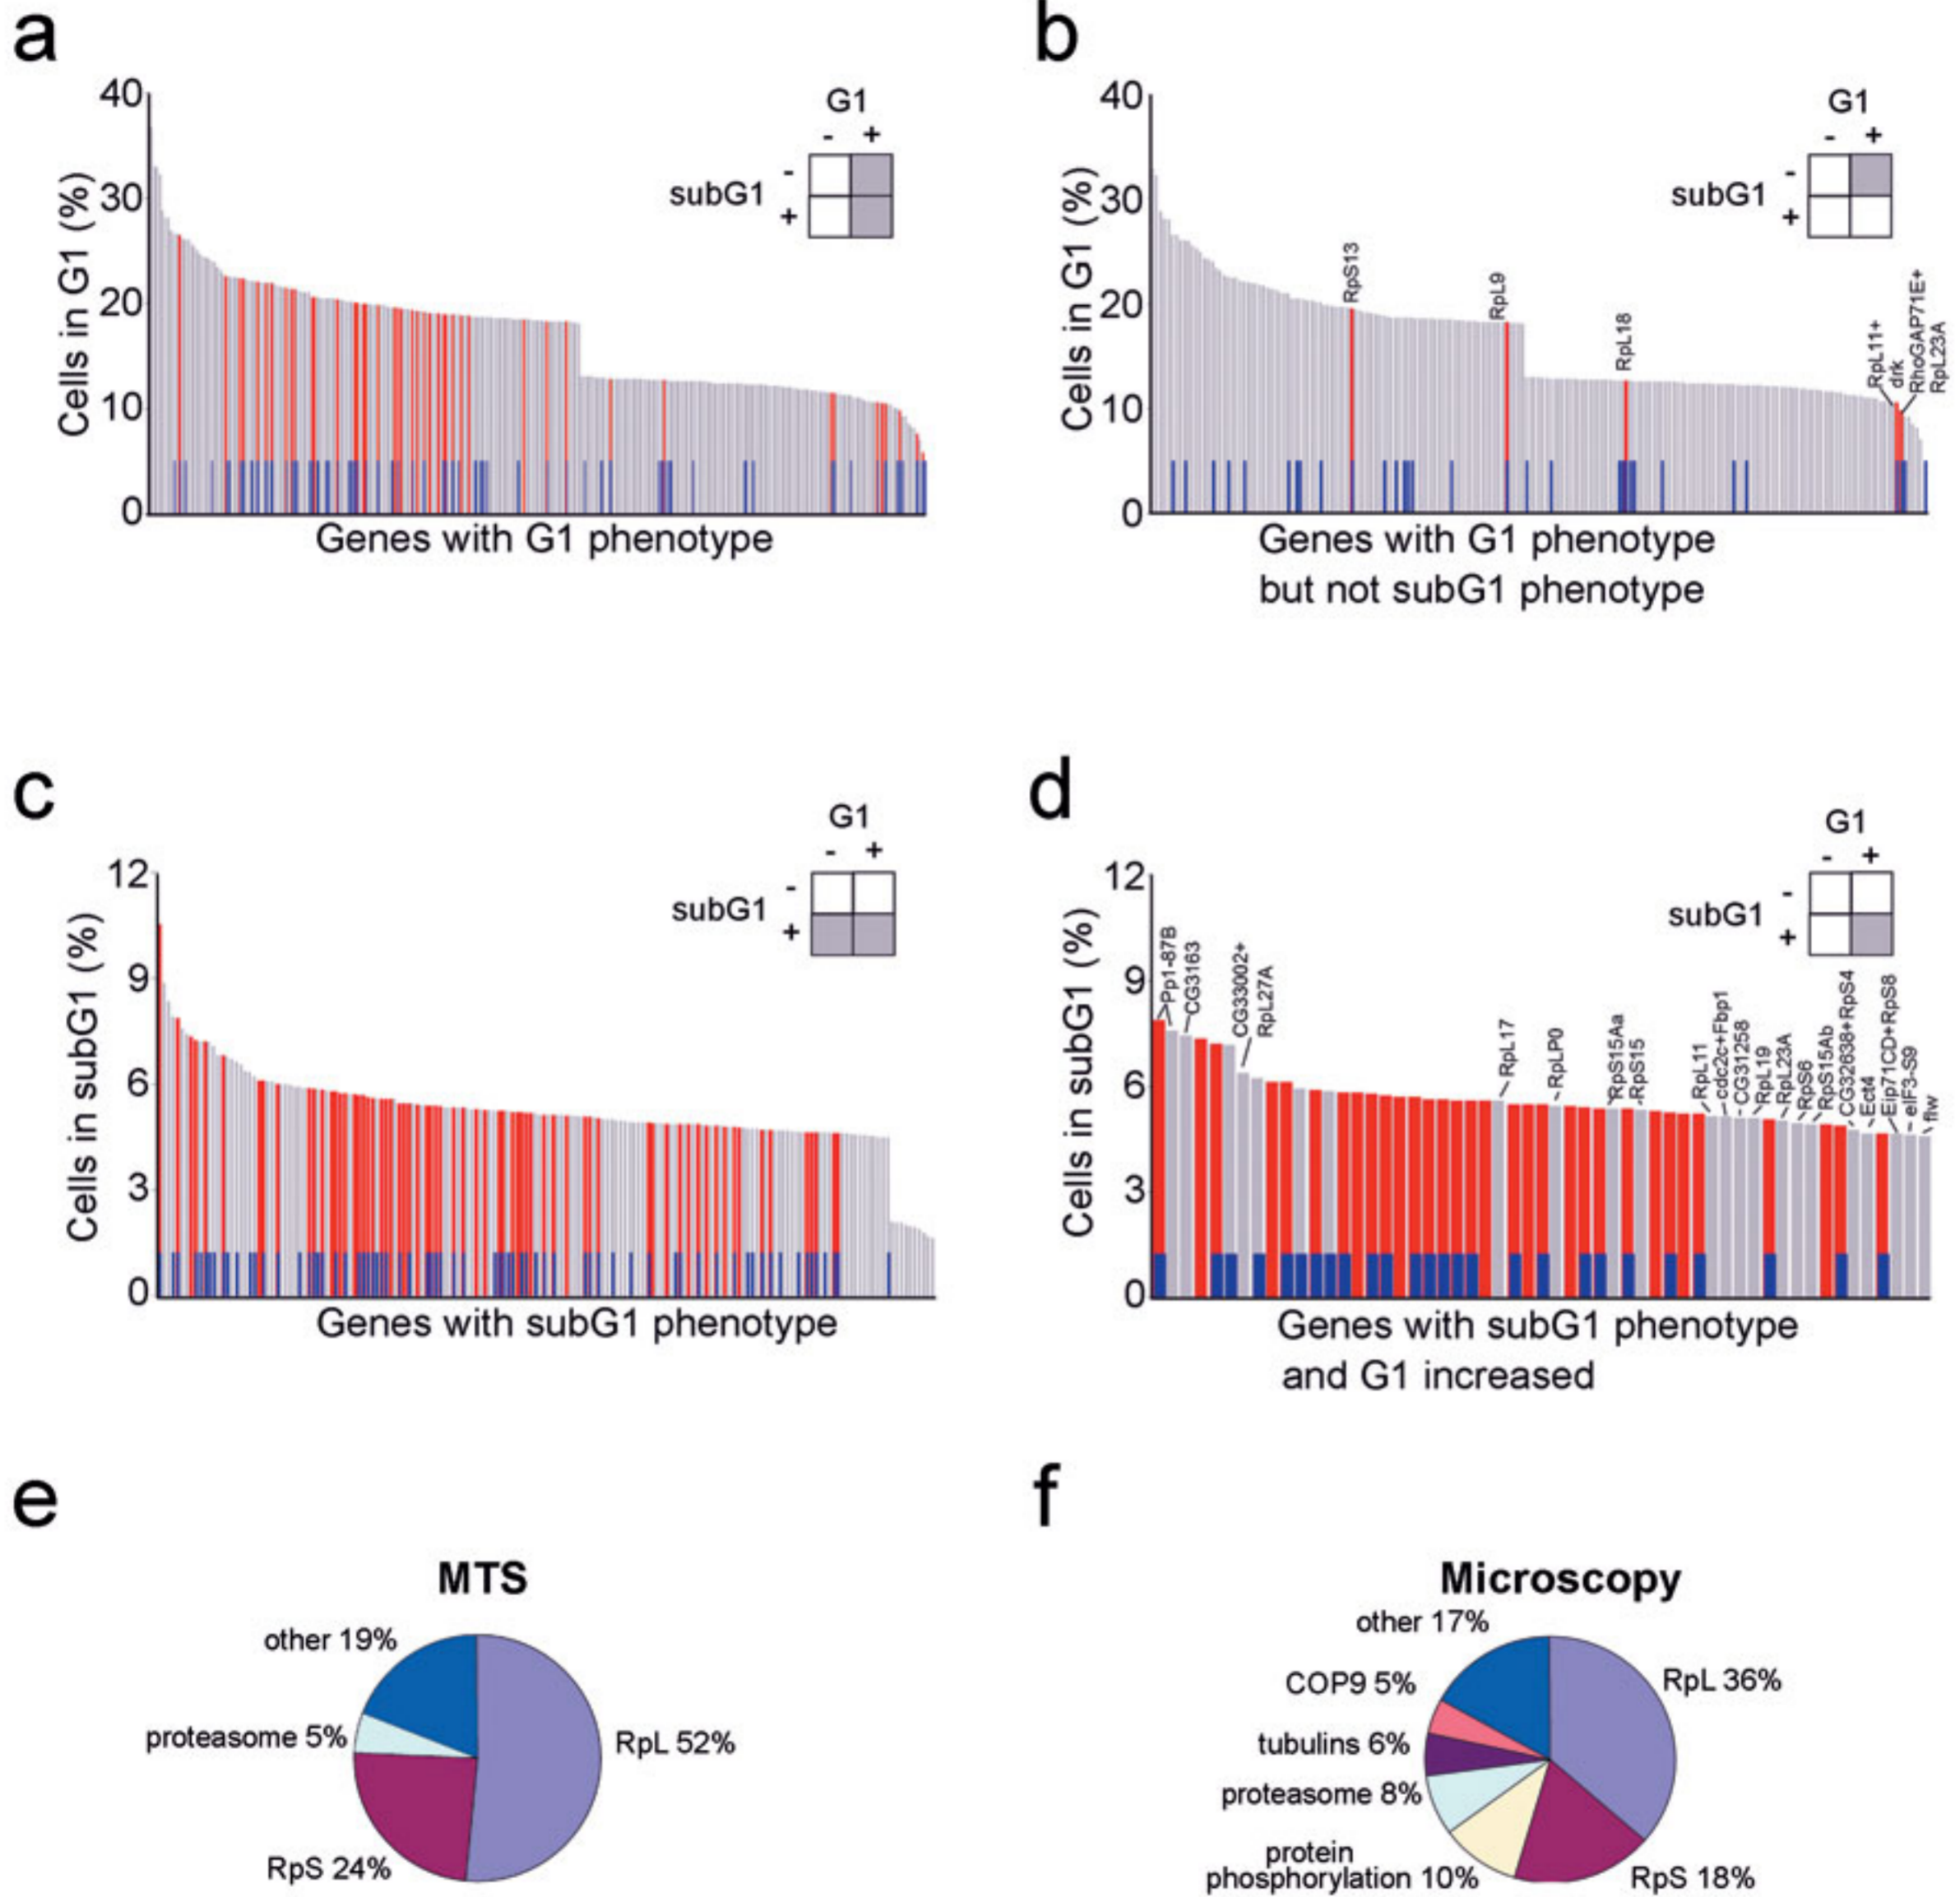

Supplement: nature04469-s13.pdf [file nature04469-s13.pdf]
